# Supplementary material for: Probing the Statistical Properties of Unknown Texts: Application to the Voynich Manuscript
Source: PLoS One. 2013 Jul 2;8(7):e67310. doi: 10.1371/journal.pone.0067310 (PMC3699599; doi:10.1371/journal.pone.0067310)
Supplement: Table S3 — Set of books in Portuguese and English employed to validate the methodology for checking the compatibility with shuffled and normal texts. (TEX) [file pone.0067310.s004.tex]

\begin{table*}[h]
    \centering
    \caption{Set of books in Portuguese and English employed to validate the methodology for checking the compatibility with shuffled and normal texts.}
        \begin{tabular}{|c|c|c|}
        \hline
        {\bf Abbreviation} & {\bf Title} & {\bf Author} \\
        \hline
        {\bf DCO} & David Copperfield & Charles Dickens\\
        {\bf DRA} & Dracula & Bram Stoker \\
        {\bf EVE} & Evelina (the History of a Young Lady's Entrance) & Fanny Burney\\
        {\bf GEP} & Great Expectations & Charles Dickens\\
        {\bf HTJ} & History of Tom Jones, a Foundling & Henry Fielding\\
        {\bf MDC} & Moby Dick  & Herman Melville \\
        {\bf PER} & Persuasion & Jane Austen \\
        {\bf PPR} & Pride and Prejudice & Jane Austen \\
        {\bf RCR} & Robinson Crusoe & Daniel Defoe\\
        {\bf ULY} & Ulysses & James Joyce \\
        \hline
        {\bf MOR} & A Moreninha & Joaquim Manuel de Macedo \\
        {\bf CPE} & Ao Correr da Pena & José de Alencar \\
        {\bf BRC} & Memórias Póstumas de Brás Cubas & Machado de Assis \\
        {\bf CON} & Contrastes e confrontos & Euclides da Cunha \\
        {\bf EJC} & Esaú e Jacó & Machado de Assis \\
        {\bf GSV} & Grande Sertão: Veredas &  João Guimarães Rosa \\
        {\bf MSM} & Memórias de um Sargento de Milícias & Manuel Antônio de Almeida \\
        {\bf GUA} & O Guarani & José de Alencar \\
        {\bf POL} & Triste Fim de Policarpo Quaresma & Lima Barreto \\
        {\bf PBA} & O Primo Basílio & Eça de Queirós \\
        \hline
        \end{tabular}
\end{table*}
